# Supplementary material for: Proteoliposomal formulations of an HIV-1 gp41-based miniprotein elicit a lipid-dependent immunodominant response overlapping the 2F5 binding motif
Source: Sci Rep. 2017 Jan 13;7:40800. doi: 10.1038/srep40800 (PMC5234007; doi:10.1038/srep40800)
Supplement: Supplementary Information [file srep40800-s1.pdf]

**Proteoliposomal formulations of an HIV-1 gp41-based miniprotein elicit a lipid-dependent immunodominant response overlapping the 2F5 binding motif**

Luis M Molinos-Albert, Eneritz Bilbao, Luis Agulló, Silvia Marfil, Elisabet García, Maria Luisa Rodríguez de la Concepción, Nuria Izquierdo-Useros, Cristina Vilaplana, Jon A. Nieto-Garai, F.-Xabier Contreras, Martin Floor, Pere J Cardona, Javier Martinez-Picado, Bonaventura Clotet, Jordi Villà-Freixa, Maier Lorizate, Jorge Carrillo, Julià Blanco

**SUPPLEMENTARY INFORMATION**

# SUPPLEMENTARY FIGURE 1

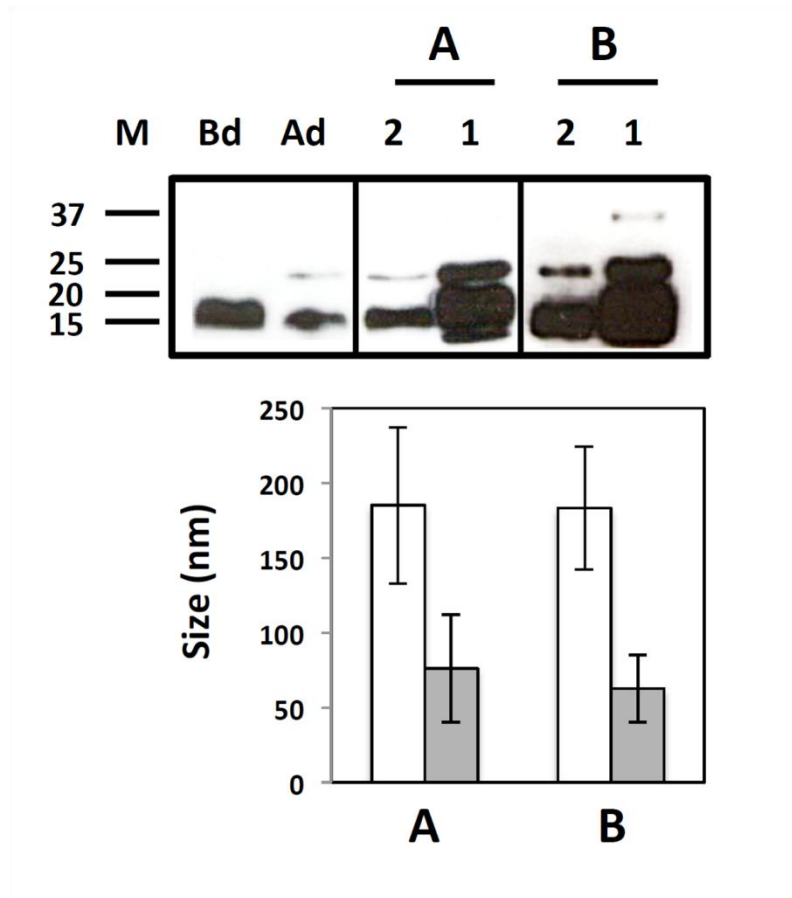

**Supplementary figure 1. Western Blot analysis and size distribution of proteoliposomes before and after reconstitution in water.** Western Blot analysis (up) of Gp41-MinTT, lipids and detergent mixture before dialysis (Bd), proteoliposome after dialysis (Ad) as well as 1 and 2 fractions of purified proteoliposomes before (A) and after (B) reconstitution. Below, size distribution of purified proteoliposomes before (A) and after (B) reconstitution. Z average in white and band width in grey. Proteoliposome mean polydispersion was 0,25 for A and 0,17 for B. Values are mean  $\pm$  SD of 6 independent preparations.

## SUPPLEMENTARY FIGURE 2

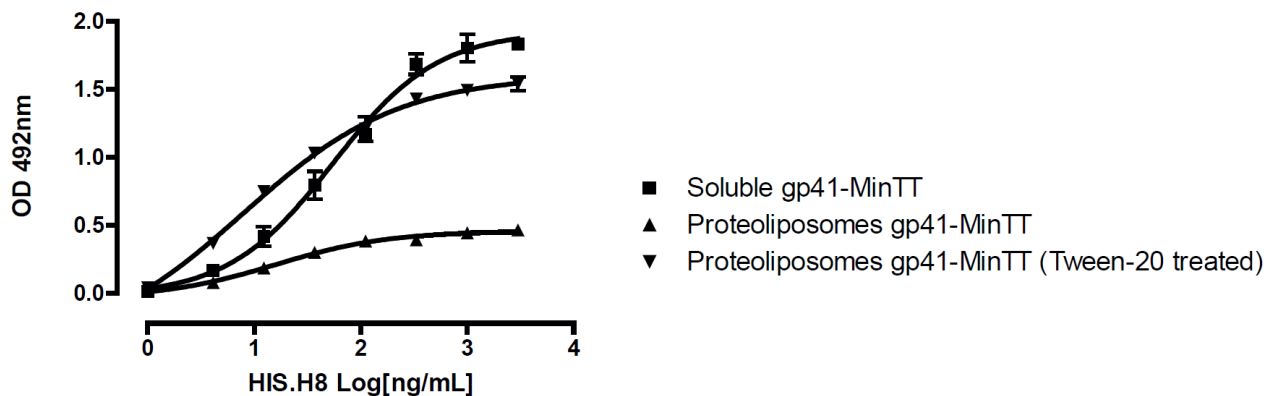

**Supplementary figure 2. Characterization of gp41-MinTT protein orientation within proteoliposomes.** Determination of histidine tag (6xHis) exposure within proteoliposomes. Representative sandwich ELISA experiment of gp41-MinTT as soluble protein (squares), proteoliposomes (face up triangles) and proteoliposomes treated with 0.5% of Tween-20 detergent (face down triangles). ELISA plates were coated with 100  $\mu$ l of 2F5 antibody (1 $\mu$ g/mL) and after blocking, 100  $\mu$ l/well of each sample containing 200 ng/mL of gp41-MinTT was added. Serial-diluted concentrations of mouse monoclonal antibody HIS.H8 (catalog number MA1-21315) was used to determine the level of exposure of the histidine tag. Read out was performed by an (HRP)-conjugated F(ab)<sub>2</sub> Goat anti-mouse IgG Fc specific antibody (Jackson ImmunoResearch).

## SUPPLEMENTARY FIGURE 3

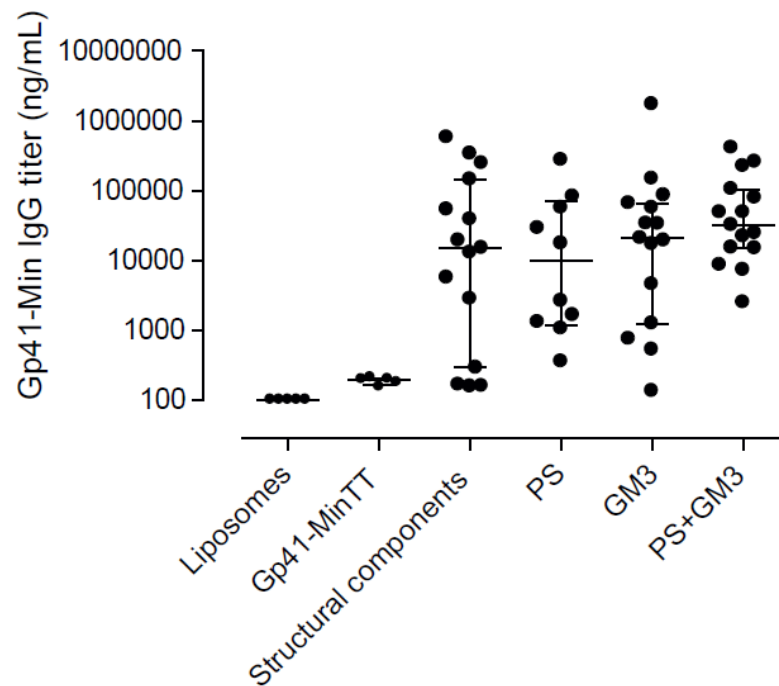

**Supplementary figure 3. Individual contribution of PS and GM3 to gp41-MinTT immunogenicity.** Gp41-Min specific IgG titers of immunized animals with liposomes containing only structural components (POPC with or without CHOL and SM) or adding GM3, PS or both are displayed.

## SUPPLEMENTARY FIGURE 4

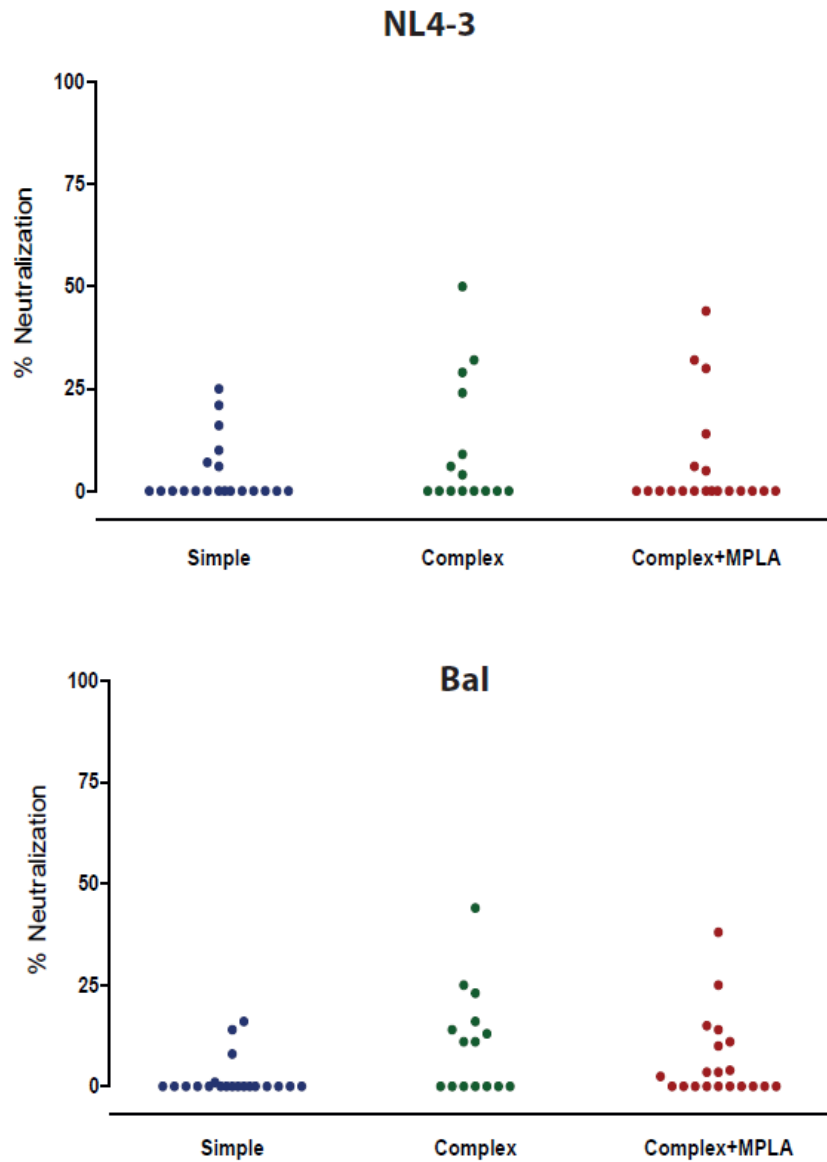

**Supplementary figure 4. Neutralizing activity of sera from immunized animals.** The ability of sera obtained at sacrifice was assessed in TZM-bl assays against the HIV-1 isolates NL4-3 and BaL at a single 1/100 dilution. The neutralizing activity is shown for the different groups of immunized animals

# SUPPLEMENTARY FIGURE 5

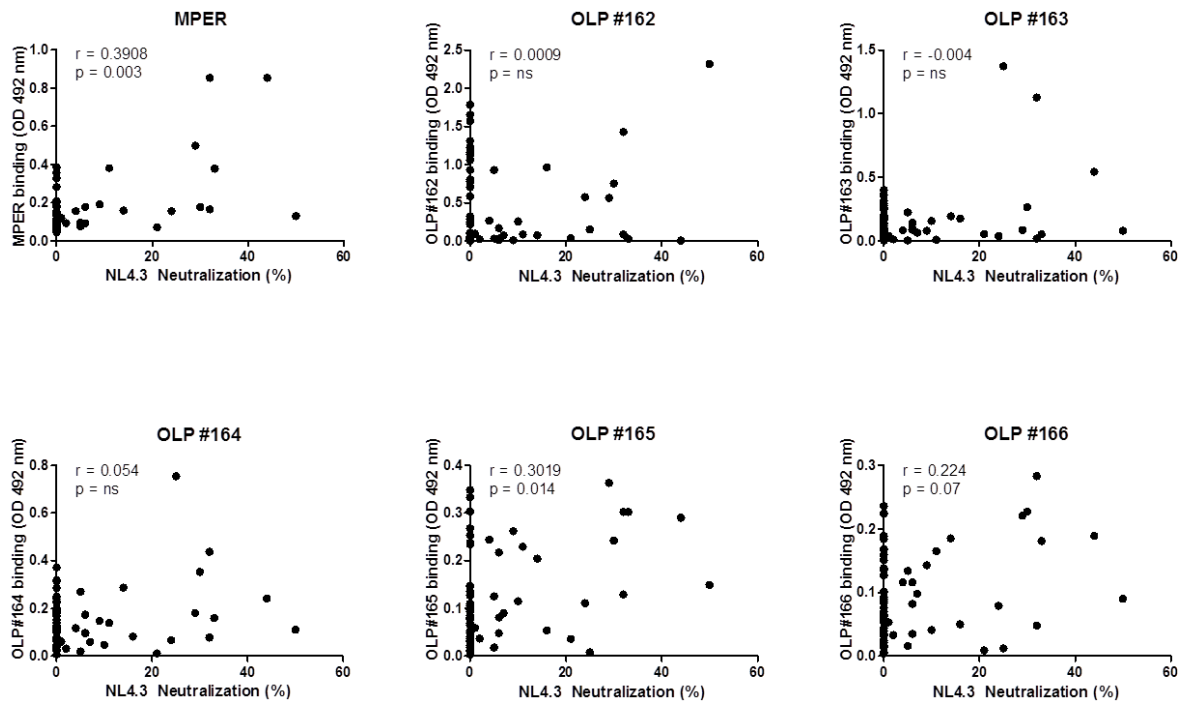

**Supplementary figure 5.** Correlation (Spearman test) of OLP peptide binding ELISA data with neutralization activity of immunized animal sera. Values were determined as described in Methods section of the manuscript

## SUPPLEMENTARY FIGURE 6

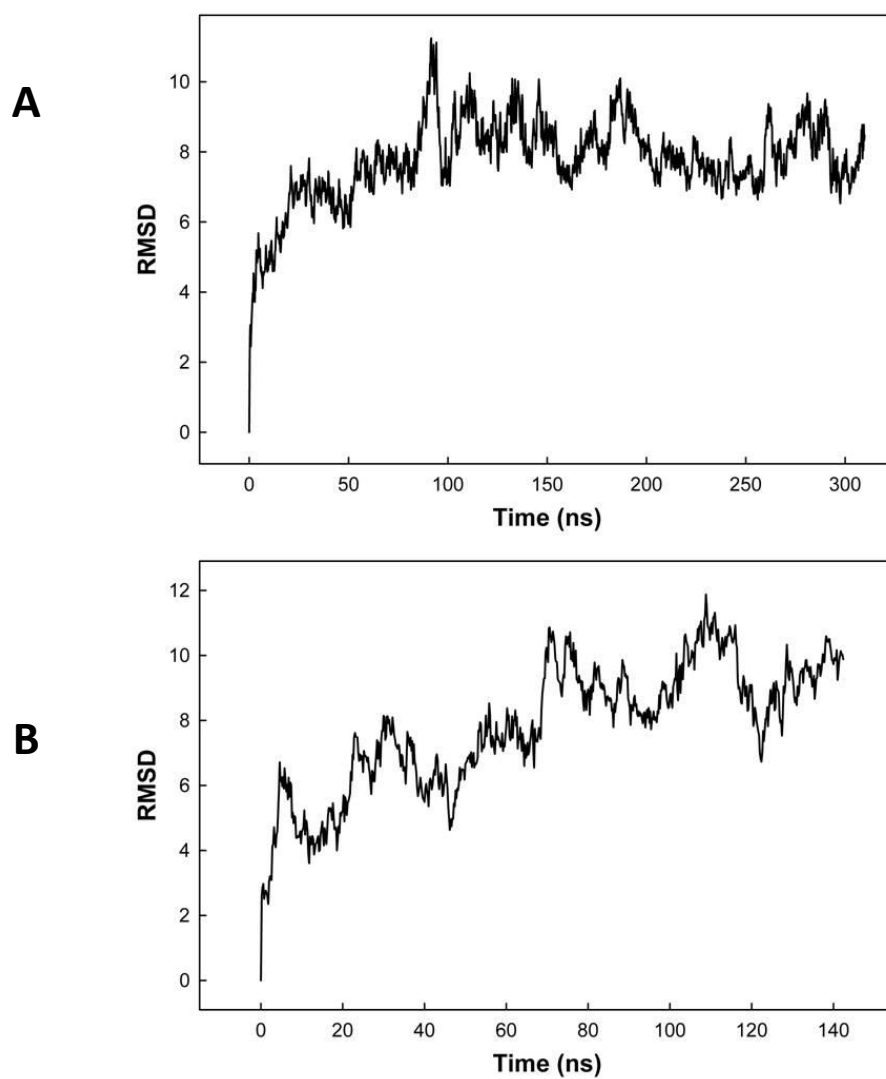

**Supplementary figure 6.** Root-mean-square deviation of atomic positions (RMSD) during molecular dynamics of the gp41-Min protein embedded in a POPC bilayer (A) and complex bilayer (B).
